# Supplementary material for: A solid-state synthetic strategy toward nickel-based bimetallic interstitial compounds (MNi3Cx, M = Zn, In, Ga)
Source: Royal Society of Chemistry journal article supplement (doi:10.1039/d3dt01331f), 2023-01-01
Supplement: d3dt01331f1.pdf [file d3dt01331f1.pdf]

## Electronic Supplementary Information

### A solid-state synthetic strategy toward nickel-based bimetallic interstitial compounds

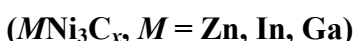

Yali Lv,<sup>a</sup> Mengxiang Ren,<sup>a</sup> Ping Wang,<sup>a</sup> Zupeng Chen,<sup>b</sup> Xiaoling Mou,<sup>\*a,c</sup> Jiahui Fan,<sup>a</sup> Jun Zhang,<sup>\*d</sup> Ronghe Lin<sup>a,c</sup>  
and Jingwei Li,<sup>\*e</sup> Yunjie Ding<sup>\*a,e,f</sup>

<sup>a</sup>Hangzhou Institute of Advanced Studies, Zhejiang Normal University, 1108 Gengwen Road, Hangzhou 311231, China. Email: xiaoling.mou@zjnu.edu.cn, dyj@dicp.ac.cn

<sup>b</sup>International Innovation Center for Forest Chemicals and Materials, College of Chemical Engineering, Nanjing Forestry University, 159 Longpan Road, Nanjing 210037, China.

<sup>c</sup>Key Laboratory of the Ministry of Education for Advanced Catalysis Materials, Zhejiang Normal University, 688 Yingbin Road, Jinhua 321004, China.

<sup>d</sup>College of Chemistry, Chemical Engineering and Materials Science, Soochow University, Suzhou 215123, China. Email: jzhang2017@@@suda.edu.cn

<sup>e</sup>Dalian National Laboratory for Clean Energy, Dalian Institute of Chemical Physics, Chinese Academy of Sciences, 457 Zhongshan Road, Dalian 116023, China. Email: lijw@dicp.ac.cn

<sup>f</sup>The State Key Laboratory of Catalysis, Dalian Institute of Chemical Physics, Chinese Academy of Sciences, 457 Zhongshan Road, Dalian 116023, China.

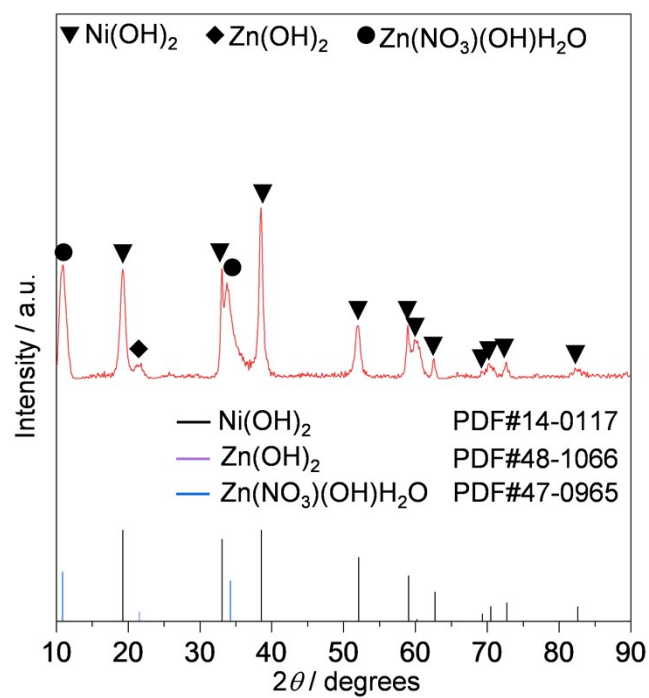

**Fig. S1.** The PXRD pattern of the as-prepared Ni-Zn precipitate from the co-precipitation method. Vertical lines are the reference standards.

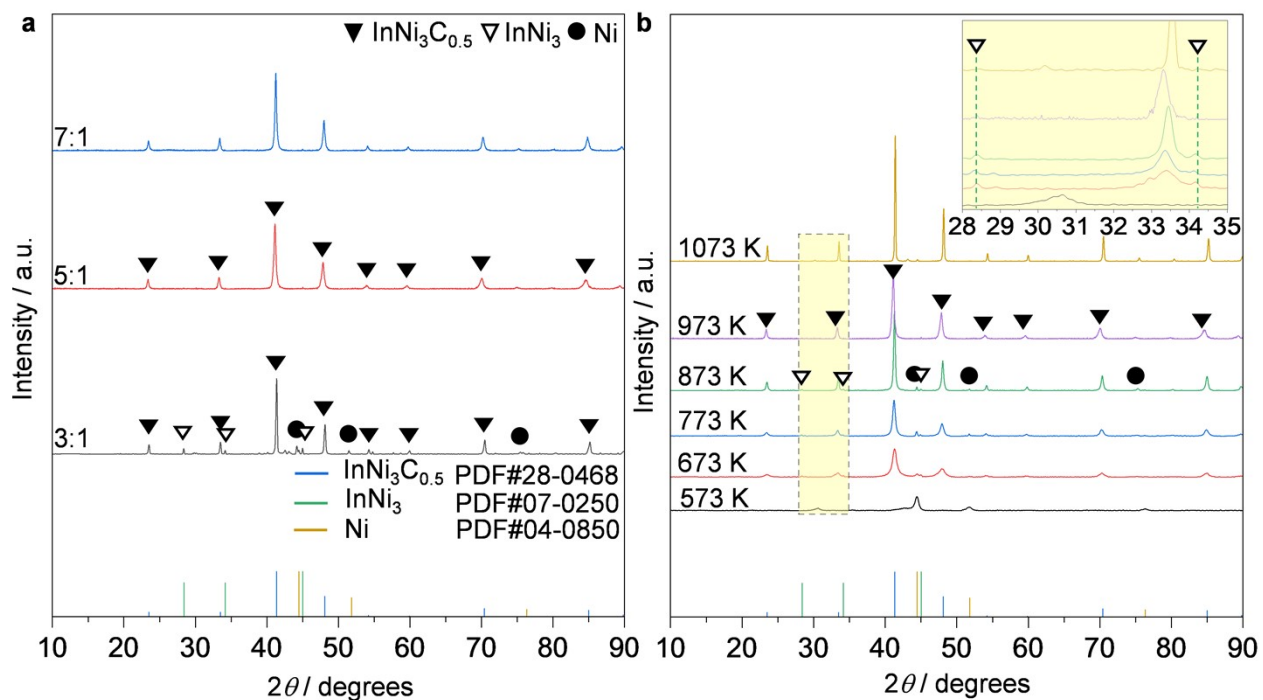

**Fig. S2.** The PXRD patterns of products synthesized by the solid-state reaction between the metal hydroxides of Ni and In, and melamine under different synthetic parameters: **a**, Weight ratios of melamine:Ni-In precursors = 3:1-7:1, 973 K, 4 h in  $\text{H}_2$ , **b**, Annealing temperatures of 573-1073 K, weight ratios of melamine:Ni-In precursors = 5:1, 4 h in  $\text{H}_2$ . Inset in **b** shows the zoom in at 28-35°  $2\theta$ . Vertical lines are the reference standards.

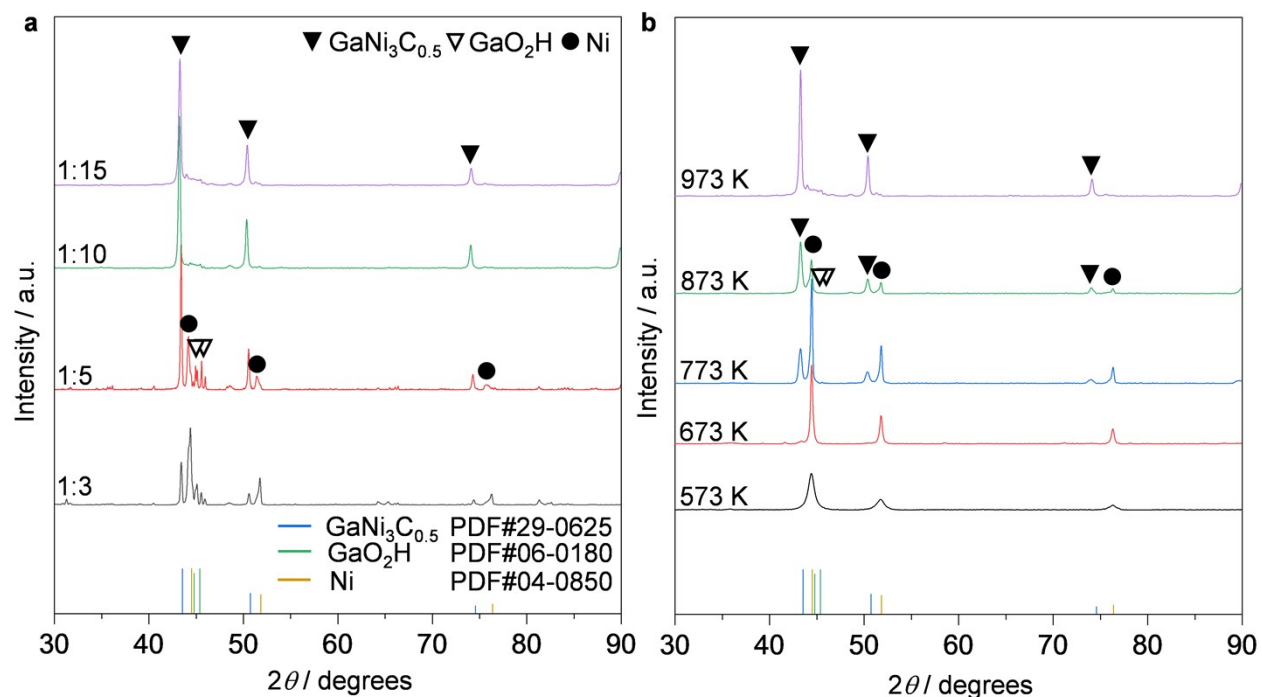

**Fig. S3.** The PXRD patterns of products synthesized by the solid-state reaction between the metal hydroxides of Ni and Ga, and melamine under different synthetic parameters: **a**, Weight ratios of melamine:Ni-Ga precursors = 3:1-15:1, 973 K, 4 h in  $H_2$ , **b**. Annealing temperatures of 573-973 K, weight ratios of melamine:Ni-In precursors = 15:1, 4 h in  $H_2$ . Vertical lines are the reference standards.

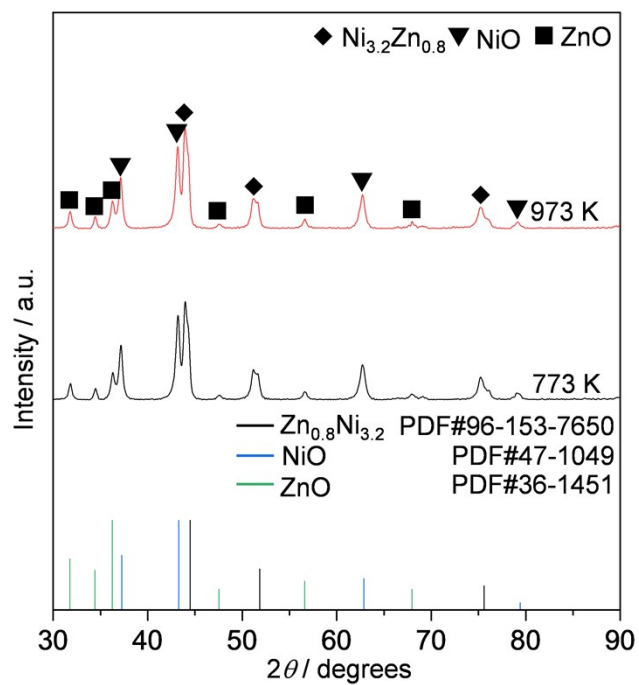

**Fig. S4.** The PXR D patterns of products synthesized by annealing the co-precipitation-derived precursors in  $\text{H}_2$  for 4 h at 773 and 973 K. Vertical lines are the reference standards.

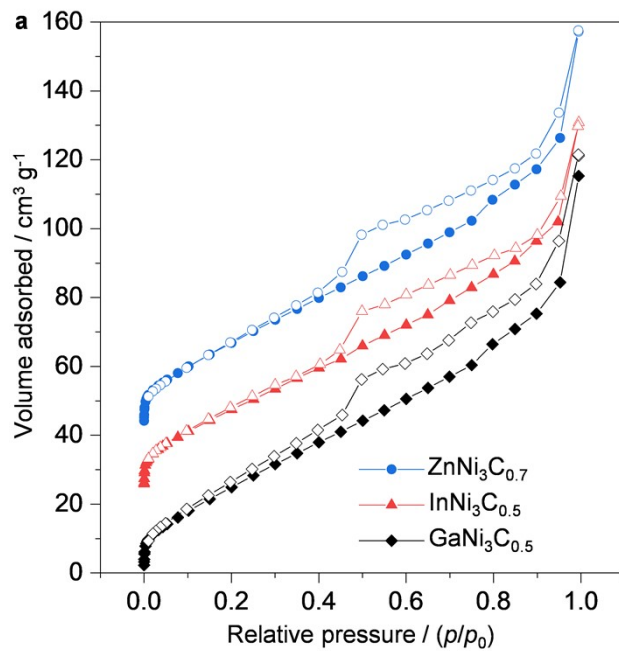

**b**

| Samples                       | $V_{\text{total}}/$<br>( $\text{cm}^3\text{g}^{-1}$ ) | $S_{\text{BET}}/$<br>( $\text{m}^2\text{g}^{-1}$ ) |
|-------------------------------|-------------------------------------------------------|----------------------------------------------------|
| $\text{ZnNi}_3\text{C}_{0.7}$ | 0.15                                                  | 63.3                                               |
| $\text{InNi}_3\text{C}_{0.5}$ | 0.14                                                  | 65.2                                               |
| $\text{GaNi}_3\text{C}_{0.5}$ | 0.14                                                  | 64.2                                               |

**Fig. S5. a**, The  $\text{N}_2$  sorption isotherms of the developed catalysts and **b**, the key porosity parameters.

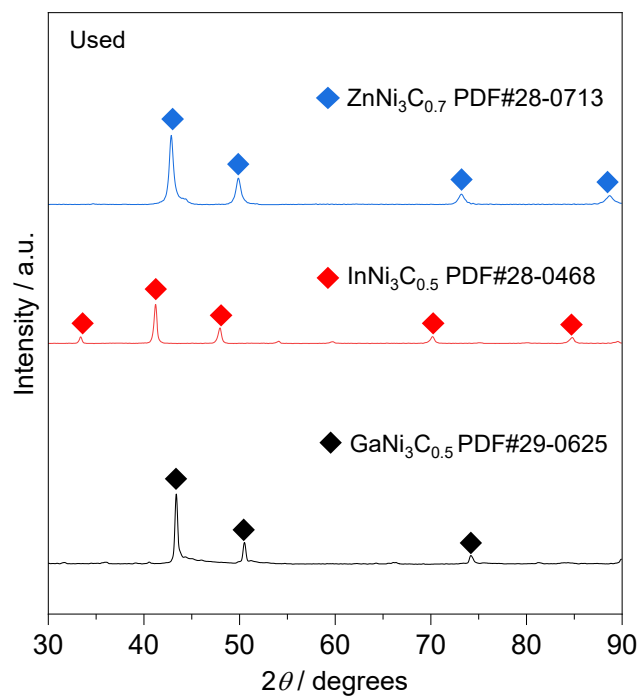

**Fig. S6.** The PXRD patterns of the catalysts after the testing in DMO hydrogenation.

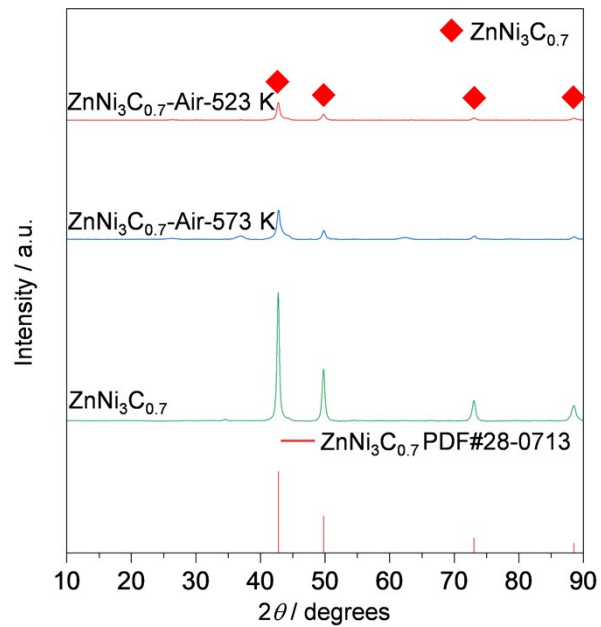

**Fig. S7.** The PXR D patterns of the as-prepared ZnNi<sub>3</sub>C<sub>0.7</sub> and after oxidation in air at different temperatures for 3 h.



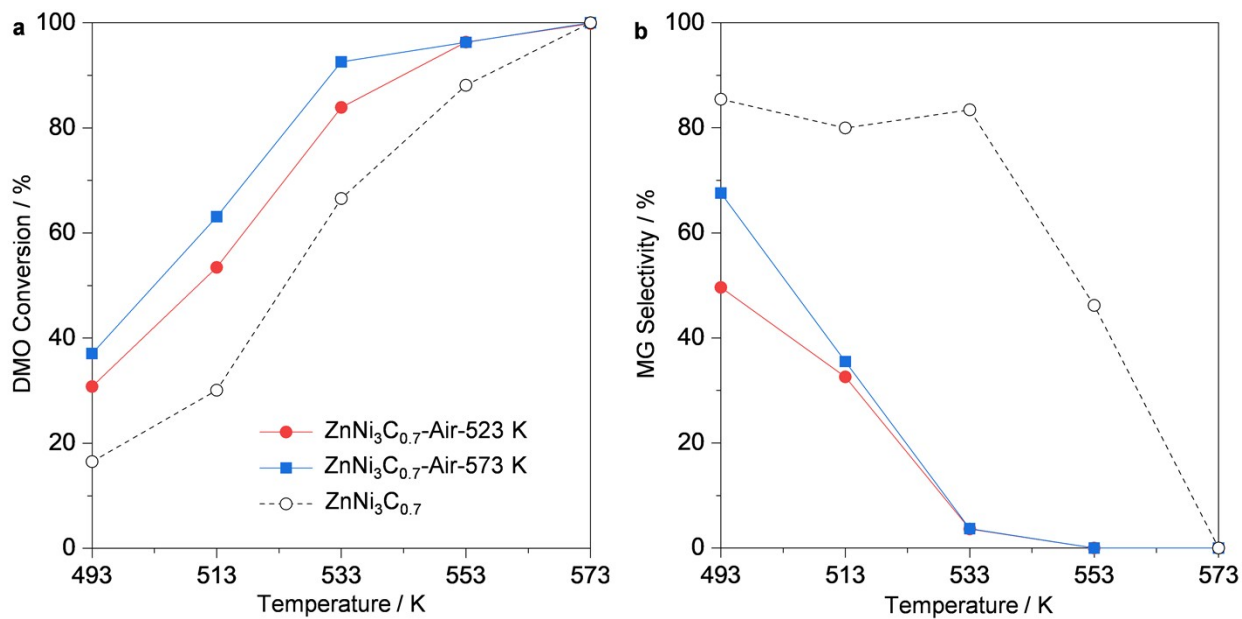

**Fig. S8.** Catalytic performance of the as-prepared and oxidized ZnNi<sub>3</sub>C<sub>0.7</sub> in the selective hydrogenation of DMO. Conditions: catalyst weight 0.5 g, liquid hourly space velocity based on DMO of 0.55 h<sup>-1</sup>, molar H<sub>2</sub>:DMO of 70, and P = 2.5 MPa. **a**, DMO conversion, **b**, MG selectivity.
